# Supplementary material for: Impact of Coronavirus Disease 2019 on Unresectable Hepatocellular Carcinoma Treated with Atezolizumab/Bevacizumab
Source: MDPI journal article supplement (doi:10.3390/jcm13051335), 2024-02-27
Supplement: s1 [file s1]

**Supplementary Table S1. Organ dysfunction and inflammatory markers according to COVID severity**

| No  | Age | Sex | ANC<br>(/uL) | Lym<br>(/uL) | NLR  | CRP<br>(mg/dL) | LDH<br>(U/L) | COVID severity | *Kidney<br>injury | *Liver<br>injury | *Event |
|-----|-----|-----|--------------|--------------|------|----------------|--------------|----------------|-------------------|------------------|--------|
| 14  | 59  | M   | 1620.5       | 756.2        | 2.1  | 1.1            | 218.0        | Mild           | X                 | X                | X      |
| 40  | 63  | M   | 1015.2       | 1043.4       | 1.0  | 0.7            | 301.0        | Mild           | X                 | X                | X      |
| 60  | 51  | M   | 9224.9       | 2558.2       | 3.6  | 11.4           | 343.0        | Moderate       | X                 | O                | O      |
| 98  | 41  | M   | 1200.6       | 930.9        | 1.3  | 0.6            | 339.0        | Mild           | X                 | O                | O      |
| 99  | 69  | F   | 15580.0      | 1025.0       | 15.2 | 2.8            | 261.0        | Severe         | O                 | O                | O      |
| 101 | 46  | M   | 11787.2      | 1237.1       | 9.5  | 19.9           | 247.0        | Moderate       | X                 | O                | O      |
| 106 | 44  | M   | 5350.5       | 2996.7       | 1.8  | 0.1            | 200.0        | Mild           | X                 | X                | X      |
| 108 | 54  | M   | 761.1        | 387.0        | 2.0  | 0.6            | 272.0        | Asymptomatic   | X                 | X                | X      |
| 117 | 61  | M   | 3380.5       | 931.2        | 3.6  | 0.2            | 197.0        | Mild           | O                 | X                | X      |
| 120 | 51  | M   | 1617.3       | 691.2        | 2.3  | 0.5            | 211.0        | Mild           | X                 | X                | O      |

|     |    |   |         |        |      |     |       |              |   |   |   |
|-----|----|---|---------|--------|------|-----|-------|--------------|---|---|---|
| 124 | 61 | M | 1780.9  | 1680.0 | 1.1  | 0.8 | 220.0 | Asymptomatic | X | X | X |
| 126 | 62 | M | 3148.7  | 830.8  | 3.8  | 1.2 | 162.0 | Moderate     | X | O | O |
| 140 | 57 | M | 2253.5  | 1278.7 | 1.8  | 0.2 | 216.0 | Asymptomatic | X | X | X |
| 149 | 68 | M | 4320.5  | 2529.8 | 1.7  | 0.4 | 224.0 | Mild         | X | X | X |
| 165 | 62 | M | 1593.6  | 172.8  | 9.2  | 4.8 | 401.0 | Moderate     | O | X | X |
| 170 | 66 | M | 1994.3  | 1178.1 | 1.7  | 0.5 | 258.0 | Mild         | X | X | X |
| 174 | 69 | M | 3554.7  | 1728.2 | 2.1  | 2.3 | 218.0 | Moderate     | X | X | X |
| 188 | 55 | M | 4229.9  | 1139.3 | 3.7  | 0.8 | 315.0 | Mild         | X | X | O |
| 195 | 53 | M | 4037.8  | 2139.0 | 1.9  | 0.7 | 213.0 | Mild         | X | X | X |
| 196 | 71 | M | 6069.5  | 2239.6 | 2.7  | 0.1 | 203.0 | Mild         | X | X | X |
| 197 | 55 | F | 3205.0  | 1348.6 | 2.4  | 5.4 | 201.0 | Mild         | X | X | O |
| 200 | 62 | M | 1938.9  | 1159.2 | 1.7  | 0.5 | 236.0 | Mild         | X | X | O |
| 211 | 62 | M | 13640.6 | 713.9  | 19.1 | 0.6 | 268.0 | Critical     | O | O | O |
| 216 | 65 | M | 4916.5  | 768.2  | 6.4  | 3.0 | 120.0 | Moderate     | O | O | O |
| 217 | 61 | M | 1795.5  | 1050.8 | 1.7  | 0.4 | 317.0 | Mild         | O | X | X |
| 226 | 58 | F | 3581.8  | 1742.7 | 2.1  | 0.1 | 218.0 | Mild         | X | X | X |

|     |    |   |        |        |     |     |       |              |   |   |   |
|-----|----|---|--------|--------|-----|-----|-------|--------------|---|---|---|
| 228 | 57 | M | 2277.3 | 770.6  | 3.0 | 0.4 | 224.0 | Mild         | X | O | O |
| 232 | 52 | M | 4992.7 | 957.6  | 5.2 | 7.3 | 337.0 | Mild         | X | X | X |
| 235 | 63 | M | 3424.9 | 938.8  | 3.6 | 1.4 | 233.0 | Mild         | X | O | O |
| 237 | 71 | M | 7112.3 | 1186.9 | 6.0 | 0.2 | 256.0 | Asymptomatic | X | O | O |
| 242 | 60 | M | 3820.2 | 908.6  | 4.2 | 8.0 | 432.0 | Moderate     | X | O | O |
| 243 | 44 | M | 3861.2 | 690.9  | 5.6 | 0.1 | 212.0 | Mild         | X | X | O |
| 245 | 71 | M | 2237.6 | 581.4  | 3.8 | 1.3 | 191.0 | Asymptomatic | X | X | O |
| 248 | 55 | M | 2231.0 | 2898.0 | 0.8 | 0.1 | 164.0 | Mild         | X | X | X |
| 251 | 56 | M | 3474.7 | 1498.3 | 2.3 | 1.9 | 193.0 | Asymptomatic | X | X | O |

NLR, neutrophil to lymphocyte ratio; CRP, C-reactive protein; eGFR, estimated glomerular filtration rate

\*Event : occurrence of complications or disease progression or death
